CORRECTION

# Correction: Spatial Distribution of Fungal Communities in an Arable Soil

The *PLOS ONE* Staff

## Notice of Republication

This article was republished on April 13, 2016, to correct errors in the figures in the PDF that were introduced during the typesetting process. The publisher apologizes for the errors. Please download this article again to view the correct version. The originally published, uncorrected article and the republished, corrected article are provided here for reference.

## Supporting Information

**S1 File. Originally published, uncorrected article.**  
(PDF)

**S2 File. Republished, corrected article.**  
(PDF)

## Reference

1. Moll J, Hoppe B, König S, Wubet T, Buscot F, Krüger D (2016) Spatial Distribution of Fungal Communities in an Arable Soil. *PLoS ONE* 11(2): e0148130. doi:[10.1371/journal.pone.0148130](https://doi.org/10.1371/journal.pone.0148130) PMID: [26840453](https://pubmed.ncbi.nlm.nih.gov/26840453/)

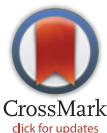

## OPEN ACCESS

**Citation:** The *PLOS ONE* Staff (2016) Correction: Spatial Distribution of Fungal Communities in an Arable Soil. *PLoS ONE* 11(4): e0154290. doi:[10.1371/journal.pone.0154290](https://doi.org/10.1371/journal.pone.0154290)

**Published:** April 21, 2016

**Copyright:** © 2016 The PLOS ONE Staff. This is an open access article distributed under the terms of the [Creative Commons Attribution License](https://creativecommons.org/licenses/by/4.0/), which permits unrestricted use, distribution, and reproduction in any medium, provided the original author and source are credited.
